# Supplementary material for: Association of Neuroretinal Thinning and Microvascular Changes with Hypertension in an Older Population in Southern Italy
Source: MDPI journal article supplement (doi:10.3390/jcm11041098), 2022-02-19
Supplement: s1 [file s1]

**Table S1.** Sociodemographic and clinical variables in subjects with and without hypertension. The Salus in Apulia Study ( $n = 731$ ).

|                                            | Without Hypertension |                        | With Hypertension  |                        | p value *     |
|--------------------------------------------|----------------------|------------------------|--------------------|------------------------|---------------|
|                                            | mean $\pm$ sd        | median<br>(min to max) | mean $\pm$ sd      | median<br>(min to max) |               |
| Education (years)                          | 6.85 $\pm$ 3.72      | 5 (0 to 18)            | 7.25 $\pm$ 3.85    | 5 (0 to 18)            | 0.19          |
| Apathy Evaluation Scale                    | 5.53 $\pm$ 5.82      | 4 (0 to 26)            | 4.52 $\pm$ 4.91    | 3 (0 to 30)            | 0.09          |
| Late-life depression                       | 19 (18.30)           | --                     | 66 (12.00)         | --                     | 0.06          |
| Physical frailty                           | 24 (21.10)           | --                     | 141 (22.90)        | --                     | 0.66 $\chi^2$ |
| Frontal Assessment Battery                 | 12.87 $\pm$ 3.76     | 13 (4 to 18)           | 13.15 $\pm$ 3.67   | 14 (0 to 18)           | 0.44          |
| FBG (mg/dl)                                | 102.2 $\pm$ 23.12    | 96.5 (79 to 239)       | 104.2 $\pm$ 22.96  | 99 (59 to 300)         | 0.06          |
| WBC ( $10^3$ cells/mm <sup>3</sup> )       | 5.97 $\pm$ 1.71      | 5.67 (1.55 to 11.09)   | 6.2 $\pm$ 2.05     | 5.93 (2.57 to 30.88)   | 0.31          |
| Platelets ( $10^3$ cells/mm <sup>3</sup> ) | 223.1 $\pm$ 50.3     | 215.5 (64 to 379)      | 226.76 $\pm$ 58.81 | 221 (65 to 563)        | 0.87          |
| HDL cholesterol (mg/dl)                    | 48.36 $\pm$ 12.5     | 45.5 (26 to 89)        | 49.43 $\pm$ 15.56  | 47 (22 to 265)         | 0.49          |
| LDL cholesterol (mg/dl)                    | 110.97 $\pm$ 29.6    | 110 (41 to 198)        | 115.74 $\pm$ 31.73 | 115 (28 to 220)        | 0.15          |
| IL 6 (pg/ml)                               | 3.43 $\pm$ 5.29      | 1.89 (0.24 to 39.3)    | 3.41 $\pm$ 6.25    | 1.87 (0.06 to 64.94)   | 0.86          |
| CRP (mg/dl)                                | 0.64 $\pm$ 1.12      | 0.36 (0.1 to 10.96)    | 0.52 $\pm$ 0.65    | 0.31 (0.1 to 9.72)     | 0.38          |

FBG: fasting blood glucose; WBC: white blood cell; HDL: high-density lipoprotein; LDL: low-density lipoprotein. All data are show as mean  $\pm$  sd, median (min to max) for continuous variables and as n (%) for proportions. \* Wilcoxon sum rank test;  $\chi^2$  Chi squared test.

**Table S2.** Ophthalmological variables in subjects with and without hypertension. The Salus in Apulia Study ( $n = 731$ ).

|                                | Without Hypertension |                        | With Hypertension |                        | <i>p</i> Value * |
|--------------------------------|----------------------|------------------------|-------------------|------------------------|------------------|
|                                | Mean $\pm$ sd        | Median<br>(Min to Max) | Mean $\pm$ sd     | Median<br>(Min to Max) |                  |
| ONH Whole peripapillary VD (%) | 53.62 $\pm$ 3.69     | 54.30 (42.17 to 59.89) | 53.76 $\pm$ 3.83  | 54.30 (27.73 to 62.72) | 0.73             |
| ONH Peripapillary area VD (%)  | 59.54 $\pm$ 2.88     | 59.69 (51.55 to 64.99) | 59.09 $\pm$ 3.21  | 59.30 (36.65 to 67.36) | 0.11             |
| ONH Nasal VD (%)               | 58.30 $\pm$ 5.40     | 59.92 (40.23 to 66.2)  | 58.08 $\pm$ 5.28  | 59.16 (33.73 to 66.73) | 0.46             |
| ONH Superior Nasal VD (%)      | 60.84 $\pm$ 7.81     | 61.45 (39.82 to 73.95) | 61.25 $\pm$ 7.06  | 62.08 (37.54 to 73.95) | 0.66             |
| ONH Inferior Nasal VD (%)      | 60.81 $\pm$ 6.73     | 61.12 (43.2 to 74.5)   | 49.42 $\pm$ 6.23  | 49.89 (36.2 to 66.2)   | 0.74             |
| ONH Temporal VD (%)            | 58.71 $\pm$ 6.21     | 59.13 (38.2 to 68.77)  | 58.65 $\pm$ 6.12  | 59.29 (38.2 to 68.77)  | 0.87             |
| ONH Superior Temporal VD (%)   | 57.33 $\pm$ 8.51     | 57.91 (26.5 to 69.61)  | 56.66 $\pm$ 9.09  | 58.06 (16.76 to 69.61) | 0.67             |
| RPC Whole peripapillary VD (%) | 52.49 $\pm$ 3.55     | 53.13 (42.33 to 59.99) | 52.54 $\pm$ 4.11  | 52.98 (23.79 to 60.7)  | 0.85             |

|                                          |              |                           |              |                           |      |
|------------------------------------------|--------------|---------------------------|--------------|---------------------------|------|
| <b>RPC Peripapillary area<br/>VD (%)</b> | 60.42 ± 3.61 | 60.85<br>(44.71 to 68.59) | 60.02 ± 3.85 | 60.41<br>(33.65 to 72.27) | 0.33 |
| <b>RPC Nasal VD (%)</b>                  | 56.18 ± 5.82 | 56.45<br>(39.17 to 67.7)  | 56.19 ± 5.69 | 56.47<br>(24.08 to 69.38) | 0.80 |
| <b>RPC Inferior Nasal VD<br/>(%)</b>     | 61.42 ± 8.02 | 63.64<br>(43.06 to 73.22) | 61.54 ± 8.12 | 63<br>(35.15 to 75.78)    | 0.90 |
| <b>RPC Superior Nasal VD<br/>(%)</b>     | 64.81 ± 6.95 | 65.81<br>(38.57 to 77.23) | 63.93 ± 7.13 | 65.36<br>(20.03 to 77.23) | 0.22 |
| <b>RPC Temporal VD (%)</b>               | 62.02 ± 5.29 | 61.83<br>(44.89 to 72.23) | 61.29 ± 6.15 | 61.55<br>(24.32 to 72.56) | 0.36 |
| <b>RPC Superior Temporal<br/>VD (%)</b>  | 51.68 ± 5.87 | 52.77<br>(36.3 to 64.4)   | 57.56 ± 8.50 | 59.48<br>(28.7 to 72.6)   | 0.28 |
| <b>RPC Inferior Temporal<br/>VD (%)</b>  | 65.53 ± 6.22 | 66.14<br>(44.53 to 78.14) | 64.45 ± 6.96 | 65.66<br>(37.54 to 78.14) | 0.18 |
| <b>FAZ (mm²)</b>                         | 0.32 ± 0.27  | 0.31<br>(0.04 to 2.65)    | 0.29 ± 0.23  | 0.28<br>(0.02 to 4.7)     | 0.13 |
| <b>DVD Foveal (%)</b>                    | 27.09 ± 7.04 | 26.09<br>(10.93 to 59.1)  | 27.68 ± 7.49 | 26.93<br>(6.27 to 74.88)  | 0.43 |

|                           |              |                           |              |                           |      |
|---------------------------|--------------|---------------------------|--------------|---------------------------|------|
| <b>DVD ParaFoveal (%)</b> | 57.32 ± 6.61 | 58.78<br>(22.74 to 66.13) | 57.42 ± 5.12 | 58.58<br>(28.18 to 66.71) | 0.75 |
| <b>DVD Whole(%)</b>       | 54.23 ± 6.07 | 55.17<br>(21.32 to 62.5)  | 54.57 ± 4.85 | 55.74<br>(29.51 to 63.29) | 0.81 |
| <b>SVD Foveal (%)</b>     | 29.47 ± 7.46 | 28.23<br>(10.62 to 59.15) | 29.52 ± 6.35 | 29.22<br>(12.75 to 61.31) | 0.68 |
| <b>SVD ParaFoveal (%)</b> | 51.77 ± 5.27 | 53.23<br>(32.84 to 60.14) | 52.05 ± 4.78 | 53.11<br>(30.25 to 60.71) | 0.85 |
| <b>SVD Whole (%)</b>      | 49.76 ± 4.08 | 50.45<br>(36.77 to 57.62) | 50.16 ± 4.16 | 50.87<br>(33.05 to 58.51) | 0.24 |

---

ONH: optic nerve head; VD: vascular density; RPC: radial peripapillary capillary; DVD: deep vascular density; SVD: superficial vascular density; \* *Wilcoxon sum rank test*.

**Table S3.** Logistic regression models on Hypertension status (Yes/No) as dependent variable and regressors. N:731.

|                              | Raw Model |              |             | Adjusted Model |              |             |                           | Raw Model |              |             | Adjusted Model |              |             |
|------------------------------|-----------|--------------|-------------|----------------|--------------|-------------|---------------------------|-----------|--------------|-------------|----------------|--------------|-------------|
|                              | OR        | CI 95%       | Stand. Err. | OR             | CI 95%       | Stand. Err. |                           | OR        | CI 95%       | Stand. Err. | OR             | CI 95%       | Stand. Err. |
| SSI                          | 1.01      | 0.99 to 1.03 | 0.02        | 1.01           | 0.99 to 1.03 | 0.01        | RPC Superior Nasal VD %   | 0.98      | 0.95 to 1.01 | 0.01        | 0.98           | 0.95 to 1.01 | 0.01        |
| Age (years)                  |           |              |             | 1.02           | 0.99 to 1.06 | 0.01        | Age (years)               |           |              |             | 1.01           | 0.98 to 1.05 | 0.01        |
| Sex (Female)                 |           |              |             | 1.18           | 0.77 to 1.80 | 0.16        | Sex (Female)              |           |              |             | 1.21           | 0.79 to 1.85 | 0.21        |
| BMI (Kg/m²)                  |           |              |             | 1.04           | 1.00 to 1.09 | 0.04        | BMI (Kg/m²)               |           |              |             | 1.04           | 0.99 to 1.09 | 0.02        |
| Mean IOP                     |           |              |             | 1.07           | 0.97 to 1.19 | 0.05        | Mean IOP                  |           |              |             | 1.07           | 0.97 to 1.19 | 0.05        |
| MMSE                         |           |              |             | 1.03           | 0.98 to 1.09 | 0.02        | MMSE                      |           |              |             | 1.04           | 0.98 to 1.09 | 0.02        |
| FAZ (mm²)                    | 0.66      | 0.34 to 1.29 | 0.34        | 0.64           | 0.33 to 1.27 | 0.34        | RPC Temporal VD (%)       | 0.98      | 0.95 to 1.01 | 0.01        | 0.98           | 0.95 to 1.01 | 0.01        |
| Age (years)                  |           |              |             | 1.01           | 0.98 to 1.05 | 0.01        | Age (years)               |           |              |             | 1.01           | 0.98 to 1.05 | 0.01        |
| Sex (Female)                 |           |              |             | 1.20           | 0.78 to 1.83 | 0.21        | Sex (Female)              |           |              |             | 1.21           | 0.79 to 1.85 | 0.21        |
| BMI (Kg/m²)                  |           |              |             | 1.04           | 1.00 to 1.09 | 0.02        | BMI (Kg/m²)               |           |              |             | 1.04           | 0.99 to 1.09 | 0.02        |
| Mean IOP                     |           |              |             | 1.07           | 0.97 to 1.19 | 0.05        | Mean IOP                  |           |              |             | 1.07           | 0.97 to 1.19 | 0.05        |
| MMSE                         |           |              |             | 1.03           | 0.98 to 1.09 | 0.02        | MMSE                      |           |              |             | 1.04           | 0.98 to 1.09 | 0.02        |
| ONH Nasal VD (%)             | 0.99      | 0.95 to 1.03 | 0.03        | 0.99           | 0.95 to 1.03 | 0.03        | RPC Whole VD (%)          | 1.00      | 0.95 to 1.06 | 0.02        | 1.01           | 0.96 to 1.07 | 0.02        |
| Age (years)                  |           |              |             | 1.01           | 0.97 to 1.05 | 0.01        | Age (years)               |           |              |             | 1.01           | 0.98 to 1.05 | 0.01        |
| Sex (Female)                 |           |              |             | 1.20           | 0.79 to 1.84 | 0.21        | Sex (Female)              |           |              |             | 1.20           | 0.79 to 1.83 | 0.21        |
| BMI (Kg/m²)                  |           |              |             | 1.04           | 1.00 to 1.09 | 0.02        | BMI (Kg/m²)               |           |              |             | 1.04           | 1.00 to 1.09 | 0.02        |
| Mean IOP                     |           |              |             | 1.07           | 0.97 to 1.19 | 0.05        | Mean IOP                  |           |              |             | 1.08           | 0.97 to 1.19 | 0.05        |
| MMSE                         |           |              |             | 1.04           | 0.98 to 1.09 | 0.02        | MMSE                      |           |              |             | 1.03           | 0.98 to 1.09 | 0.02        |
| ONH Peripapillary VD (%)     | 0.95      | 0.89 to 1.02 | 0.01        | 0.95           | 0.89 to 1.02 | 0.03        | RNFL Thickness            | 0.98      | 0.96 to 1.10 | 0.01        | 0.98           | 0.97 to 1.00 | 0.01        |
| Age (years)                  |           |              |             | 1.01           | 0.97 to 1.05 | 0.01        | Age (years)               |           |              |             | 1.01           | 0.97 to 1.05 | 0.01        |
| Sex (Female)                 |           |              |             | 1.21           | 0.79 to 1.85 | 0.21        | Sex (Female)              |           |              |             | 1.20           | 0.78 to 1.83 | 0.21        |
| BMI (Kg/m²)                  |           |              |             | 1.04           | 0.99 to 1.09 | 0.02        | BMI (Kg/m²)               |           |              |             | 1.04           | 1.00 to 1.09 | 0.02        |
| Mean IOP                     |           |              |             | 1.07           | 0.97 to 1.19 | 0.05        | Mean IOP                  |           |              |             | 1.07           | 0.96 to 1.19 | 0.05        |
| MMSE                         |           |              |             | 1.04           | 0.98 to 1.09 | 0.02        | MMSE                      |           |              |             | 1.03           | 0.98 to 1.09 | 0.02        |
| ONH Superior Nasal VD (%)    | 1.01      | 0.98 to 1.04 | 0.01        | 1.00           | 0.98 to 1.03 | 0.01        | SVD Whole                 | 1.02      | 0.98 to 1.07 | 0.02        | 1.03           | 0.98 to 1.09 | 0.02        |
| Age (years)                  |           |              |             | 1.01           | 0.97 to 1.05 | 0.01        | Age (years)               |           |              |             | 1.02           | 0.98 to 1.06 | 0.01        |
| Sex (Female)                 |           |              |             | 1.20           | 0.79 to 1.83 | 0.21        | Sex (Female)              |           |              |             | 1.19           | 0.78 to 1.82 | 0.21        |
| BMI (Kg/m²)                  |           |              |             | 1.04           | 1.00 to 1.09 | 0.02        | BMI (Kg/m²)               |           |              |             | 1.04           | 1.00 to 1.09 | 0.02        |
| Mean IOP                     |           |              |             | 1.07           | 0.97 to 1.19 | 0.05        | Mean IOP                  |           |              |             | 1.08           | 0.97 to 1.20 | 0.05        |
| MMSE                         |           |              |             | 1.03           | 0.98 to 1.09 | 0.02        | MMSE                      |           |              |             | 1.03           | 0.98 to 1.09 | 0.02        |
| ONH Superior TemporalVD(%)   | 0.99      | 0.97 to 1.01 | 0.01        | 1.00           | 0.97 to 1.03 | 0.01        | SVD Foveal                | 1         | 0.96 to 1.04 | 0.02        | 1.00           | 0.96 to 1.05 | 0.02        |
| Age (years)                  |           |              |             | 1.01           | 0.97 to 1.05 | 0.01        | Age (years)               |           |              |             | 0.99           | 0.95 to 1.05 | 0.02        |
| Sex (Female)                 |           |              |             | 1.20           | 0.79 to 1.83 | 0.21        | Sex (Female)              |           |              |             | 1.34           | 0.75 to 2.37 | 0.29        |
| BMI (Kg/m²)                  |           |              |             | 1.04           | 1.00 to 1.09 | 0.02        | BMI (Kg/m²)               |           |              |             | 1.05           | 0.99 to 1.12 | 0.03        |
| Mean IOP                     |           |              |             | 1.07           | 0.97 to 1.19 | 0.05        | Mean IOP                  |           |              |             | 1.00           | 0.87 to 1.14 | 0.06        |
| MMSE                         |           |              |             | 1.03           | 0.98 to 1.09 | 0.02        | MMSE                      |           |              |             | 1.07           | 1.01 to 1.15 | 0.03        |
| ONH Temporal VD (%)          | 1.00      | 0.97 to 1.03 | 0.02        | 1.00           | 0.97 to 1.03 | 0.01        | SVD ParaFoveal            | 1.01      | 0.97 to 1.05 | 0.02        | 1.02           | 0.98 to 1.06 | 0.01        |
| Age (years)                  |           |              |             | 1.01           | 0.97 to 1.05 | 0.01        | Age (years)               |           |              |             | 1.02           | 0.98 to 1.05 | 0.01        |
| Sex (Female)                 |           |              |             | 1.20           | 0.79 to 1.83 | 0.21        | Sex (Female)              |           |              |             | 1.21           | 0.79 to 1.84 | 0.18        |
| BMI (Kg/m²)                  |           |              |             | 1.04           | 1.00 to 1.09 | 0.02        | BMI (Kg/m²)               |           |              |             | 1.04           | 1.00 to 1.09 | 0.04        |
| Mean IOP                     |           |              |             | 1.07           | 0.97 to 1.19 | 0.05        | Mean IOP                  |           |              |             | 1.07           | 0.97 to 1.19 | 0.07        |
| MMSE                         |           |              |             | 1.03           | 0.98 to 1.09 | 0.02        | MMSE                      |           |              |             | 1.03           | 0.98 to 1.09 | 0.03        |
| ONH Whole VD (%)             | 1.01      | 0.96 to 1.06 | 0.02        | 1.02           | 0.97 to 1.07 | 0.02        | DVD Whole                 | 1.01      | 0.98 to 1.05 | 0.01        | 1.02           | 0.98 to 1.06 | 0.02        |
| Age (years)                  |           |              |             | 1.01           | 0.98 to 1.05 | 0.01        | Age (years)               |           |              |             | 1.02           | 0.98 to 1.06 | 0.01        |
| Sex (Female)                 |           |              |             | 1.21           | 0.79 to 1.85 | 0.21        | Sex (Female)              |           |              |             | 1.20           | 0.78 to 1.83 | 0.17        |
| BMI (Kg/m²)                  |           |              |             | 1.04           | 1.00 to 1.09 | 0.02        | BMI (Kg/m²)               |           |              |             | 1.04           | 1.00 to 1.09 | 0.04        |
| Mean IOP                     |           |              |             | 1.07           | 0.97 to 1.19 | 0.05        | Mean IOP                  |           |              |             | 1.08           | 0.97 to 1.19 | 0.07        |
| MMSE                         |           |              |             | 1.03           | 0.98 to 1.09 | 0.02        | MMSE                      |           |              |             | 1.03           | 0.98 to 1.09 | 0.03        |
| RPC Inferior Nasal VD(%)     | 1.00      | 0.98 to 1.03 | 0.01        | 1.00           | 0.97 to 1.00 | 0.01        | DVD Foveal                | 1.01      | 0.98 to 1.04 | 0.01        | 1.01           | 0.98 to 1.04 | 0.01        |
| Age (years)                  |           |              |             | 1.01           | 0.97 to 1.05 | 0.01        | Age (years)               |           |              |             | 1.01           | 0.97 to 1.05 | 0.01        |
| Sex (Female)                 |           |              |             | 1.20           | 0.79 to 1.84 | 0.21        | Sex (Female)              |           |              |             | 1.19           | 0.78 to 1.82 | 0.21        |
| BMI (Kg/m²)                  |           |              |             | 1.04           | 1.00 to 1.09 | 0.02        | BMI (Kg/m²)               |           |              |             | 1.04           | 1.00 to 1.09 | 0.02        |
| Mean IOP                     |           |              |             | 1.07           | 0.97 to 1.19 | 0.05        | Mean IOP                  |           |              |             | 1.07           | 0.97 to 1.19 | 0.05        |
| MMSE                         |           |              |             | 1.03           | 0.98 to 1.09 | 0.02        | MMSE                      |           |              |             | 1.04           | 0.98 to 1.09 | 0.02        |
| RPC Inferior Temporal VD (%) | 0.98      | 0.95 to 1.01 | 0.01        | 0.98           | 0.95 to 1.01 | 0.01        | DVD ParaFoveal            | 1.01      | 0.97 to 1.04 | 0.01        | 1.02           | 0.98 to 1.06 | 0.01        |
| Age (years)                  |           |              |             | 1.01           | 0.97 to 1.05 | 0.01        | Age (years)               |           |              |             | 1.02           | 0.98 to 1.06 | 0.01        |
| Sex (Female)                 |           |              |             | 1.21           | 0.79 to 1.85 | 0.21        | Sex (Female)              |           |              |             | 1.20           | 0.79 to 1.83 | 0.21        |
| BMI (Kg/m²)                  |           |              |             | 1.04           | 1.00 to 1.09 | 0.02        | BMI (Kg/m²)               |           |              |             | 1.04           | 1.00 to 1.09 | 0.02        |
| Mean IOP                     |           |              |             | 1.07           | 0.96 to 1.19 | 0.05        | Mean IOP                  |           |              |             | 1.07           | 0.97 to 1.19 | 0.05        |
| MMSE                         |           |              |             | 1.03           | 0.98 to 1.09 | 0.02        | MMSE                      |           |              |             | 1.03           | 0.98 to 1.09 | 0.02        |
| RPC Nasal VD (%)             | 1.01      | 0.97 to 1.04 | 0.01        | 1.01           | 0.97 to 1.04 | 0.01        | ONH Inferior Nasal VD (%) | 1.01      | 0.97 to 1.03 | 0.01        | 0.99           | 0.96 to 1.03 | 0.01        |
| Age (years)                  |           |              |             | 1.01           | 0.97 to 1.05 | 0.01        | Age (years)               |           |              |             | 1.101          | 0.97 to 1.05 | 0.01        |
| Sex (Female)                 |           |              |             | 1.20           | 0.79 to 1.84 | 0.21        | Sex (Female)              |           |              |             | 1.20           | 0.78 to 1.84 | 0.21        |
| BMI (Kg/m²)                  |           |              |             | 1.04           | 1.00 to 1.09 | 0.02        | BMI (Kg/m²)               |           |              |             | 1.104          | 0.99 to 1.09 | 0.02        |
| Mean IOP                     |           |              |             | 1.07           | 0.97 to 1.19 | 0.05        | Mean IOP                  |           |              |             | 1.07           | 0.96 to 1.19 | 0.05        |
| MMSE                         |           |              |             | 1.03           | 0.98 to 1.09 | 0.02        | MMSE                      |           |              |             | 1.03           | 0.98 to 1.09 | 0.02        |
| RPC Peripapillary VD (%)     | 0.97      | 0.92 to 1.03 | 0.02        | 0.97           | 0.92 to 1.03 | 0.02        |                           |           |              |             |                |              |             |
| Age (years)                  |           |              |             | 1.01           | 0.97 to 1.05 | 0.01        |                           |           |              |             |                |              |             |
| Sex (Female)                 |           |              |             | 1.20           | 0.79 to 1.84 | 0.21        |                           |           |              |             |                |              |             |
| BMI (Kg/m²)                  |           |              |             | 1.04           | 1.00 to 1.09 | 0.02        |                           |           |              |             |                |              |             |
| Mean IOP                     |           |              |             | 1.07           | 0.97 to 1.19 | 0.05        |                           |           |              |             |                |              |             |
| MMSE                         |           |              |             | 1.04           | 0.98 to 1.09 | 0.02        |                           |           |              |             |                |              |             |
| RPC Superior Temporal VD (%) | 0.98      | 0.96 to 1.01 | 0.23        | 0.98           | 0.96 to 1.01 | 0.01        |                           |           |              |             |                |              |             |
| Age (years)                  |           |              |             | 1.01           | 0.97 to 1.05 | 0.01        |                           |           |              |             |                |              |             |
| Sex (Female)                 |           |              |             | 1.19           | 0.78 to 1.83 | 0.18        |                           |           |              |             |                |              |             |
| BMI (Kg/m²)                  |           |              |             | 1.04           | 0.99 to 1.09 | 0.04        |                           |           |              |             |                |              |             |
| Mean IOP                     |           |              |             | 1.07           | 0.96 to 1.19 | 0.07        |                           |           |              |             |                |              |             |
| MMSE                         |           |              |             | 1.03           | 0.98 to 1.09 | 0.03        |                           |           |              |             |                |              |             |

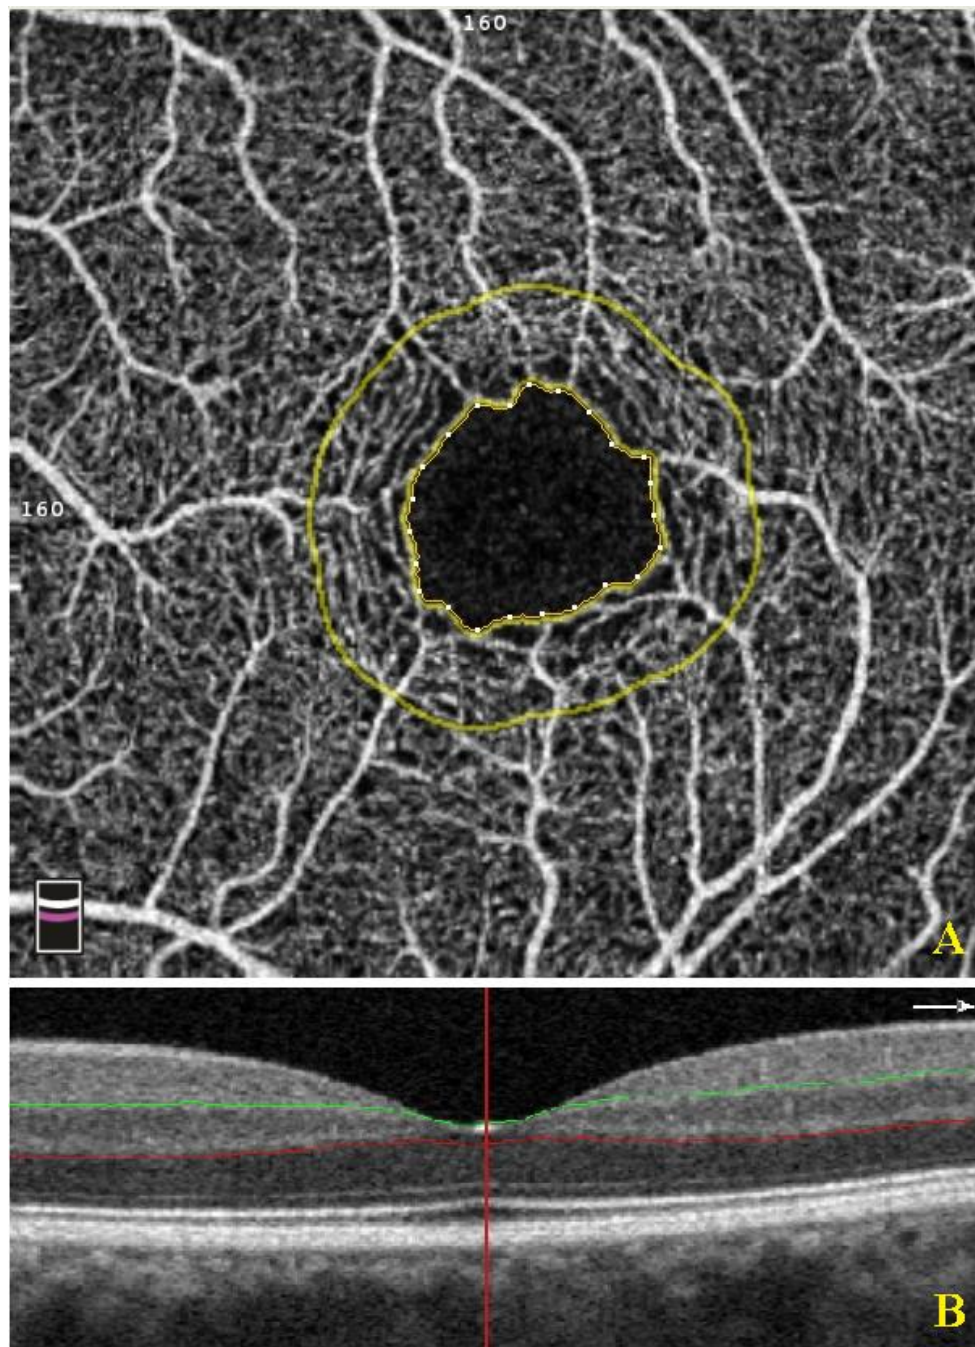

**Figure S1.** Optical coherence tomographic angiographic (OCT-A) image of the foveal avascular zone (FAZ) areas at the deep vascular plexus. The FAZ area border (inner yellow line) was outlined automatically, and the surface area was then measured in square millimeters using built-in software under the flow option of the instrument in the deep vascular plexus (A) The colored lines (red and green) in horizontal OCT B-scans show segmentation lines defining the depths in the retinal tissue (B).

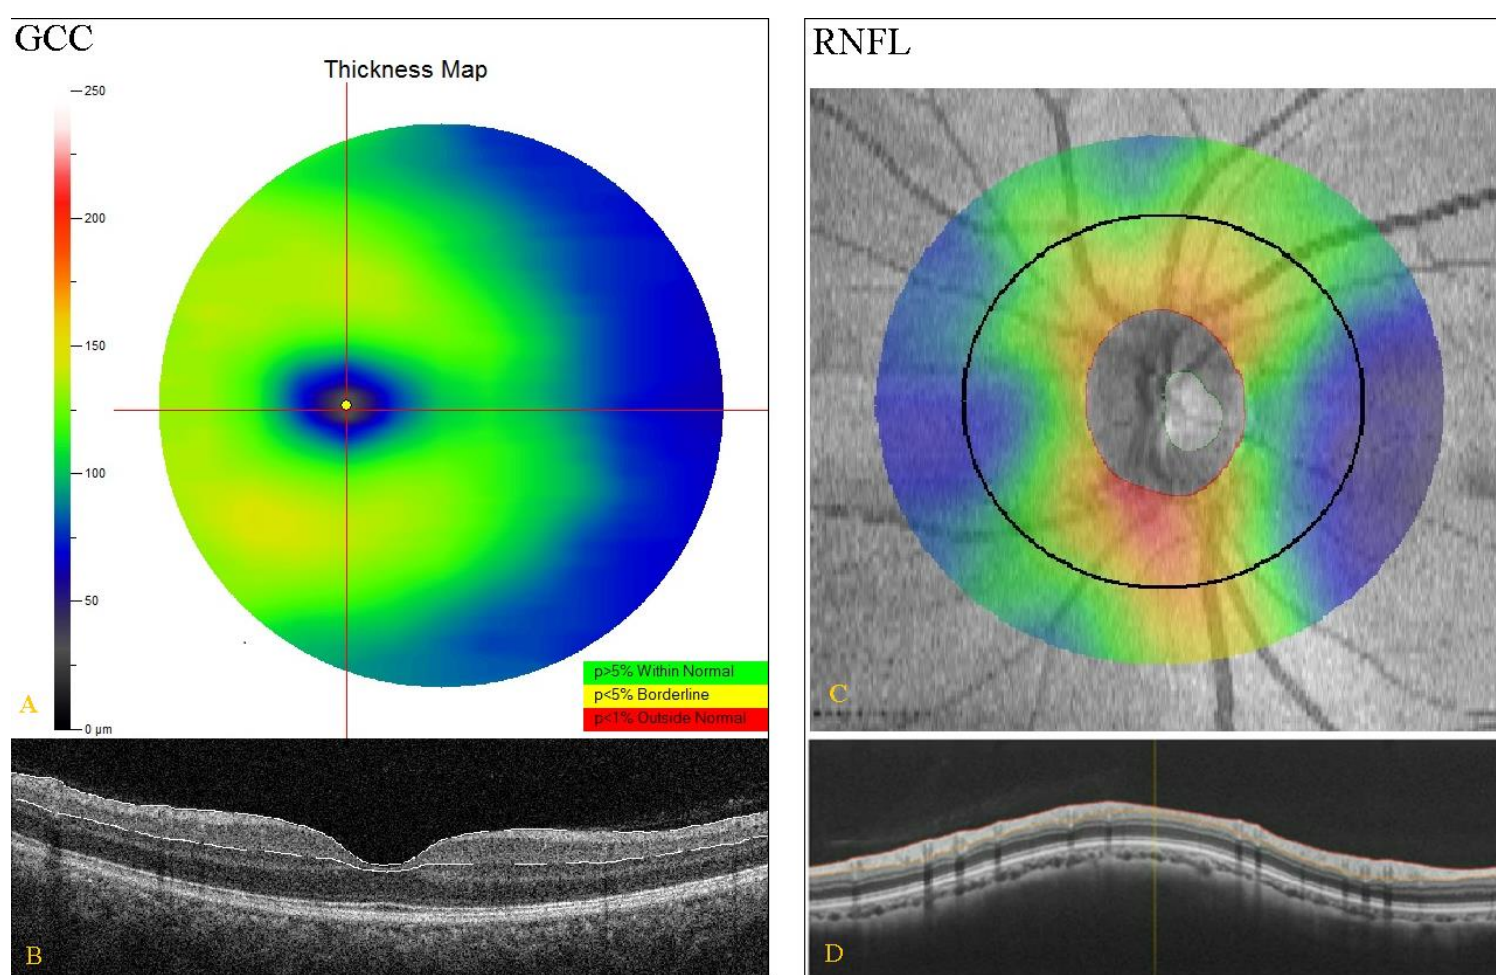

**Figure S2.** Optical coherence tomographic images of the ganglion cell complex (GCC) and retinal nerve fiber layer (RNFL) thickness. The device measures GCC and RNFL thickness within an automatically rendered 7-mm<sup>2</sup> area, centered 1 mm temporally to the fovea. The system produces a color-coded thickness map for interpretation. (A,C) Thicker regions of GCC and RNFL are displayed as yellow and orange, whereas thinner regions are displayed as blue and green. Acquired thicknesses are compared with values from a normative database and displayed as a significance map. The color-coded map shows the corresponding probabilities of deviation from the normal range based on comparison with an age-matched control group of healthy subjects. (B,D) Cross-sectional B-scan displays the segmentation used for GCC and RNFL analysis. (B) The traced boundaries for the GCC scan (white lines) include the inner limiting membrane and the outer IPL. (D) The traced boundaries for the RNFL scan (colored lines) include the inner limiting membrane and the outer IPL.
